# Supplementary material for: Gut metabolites predict Clostridioides difficile recurrence
Source: PubMed Central journal article supplement (PMC9178838; doi:10.1186/s40168-022-01284-1), 2022-06-09

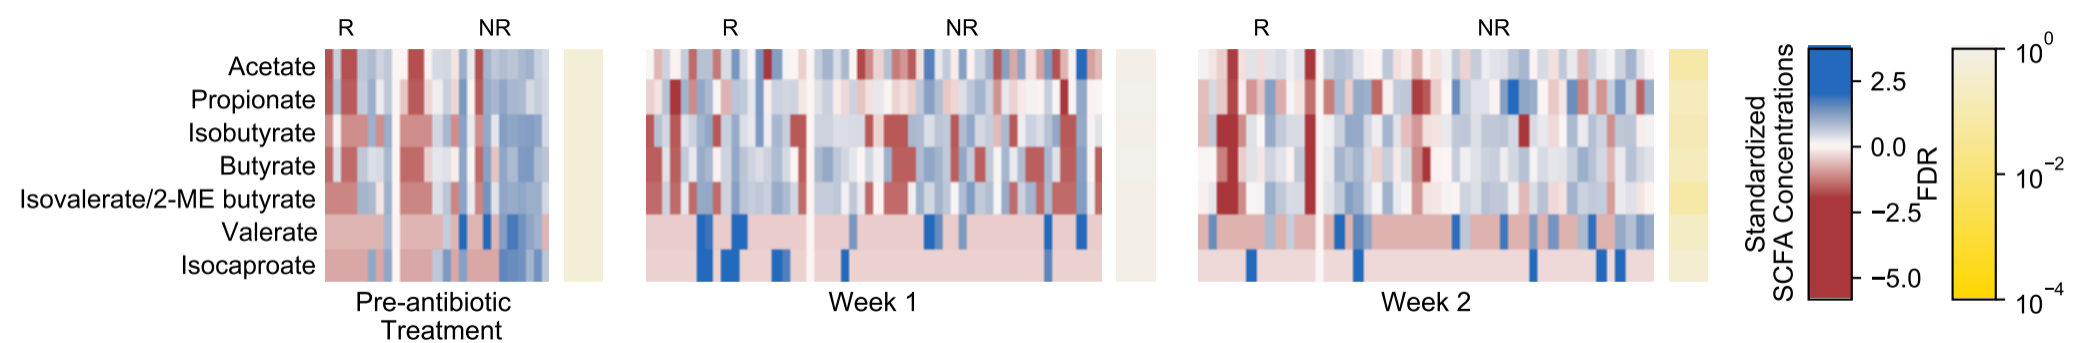

Supplement: 40168_2022_1284_MOESM9_ESM.pdf [file 40168_2022_1284_MOESM9_ESM.pdf]
